# Supplementary material
Source: PubMed Central journal article supplement (PMC3503201)
Supplement: 1213498109_pnas.201213498SI.pdf [file 1213498109_pnas.201213498SI.pdf]

# Supporting Information

Villarreal and Renner 10.1073/pnas.1213498109

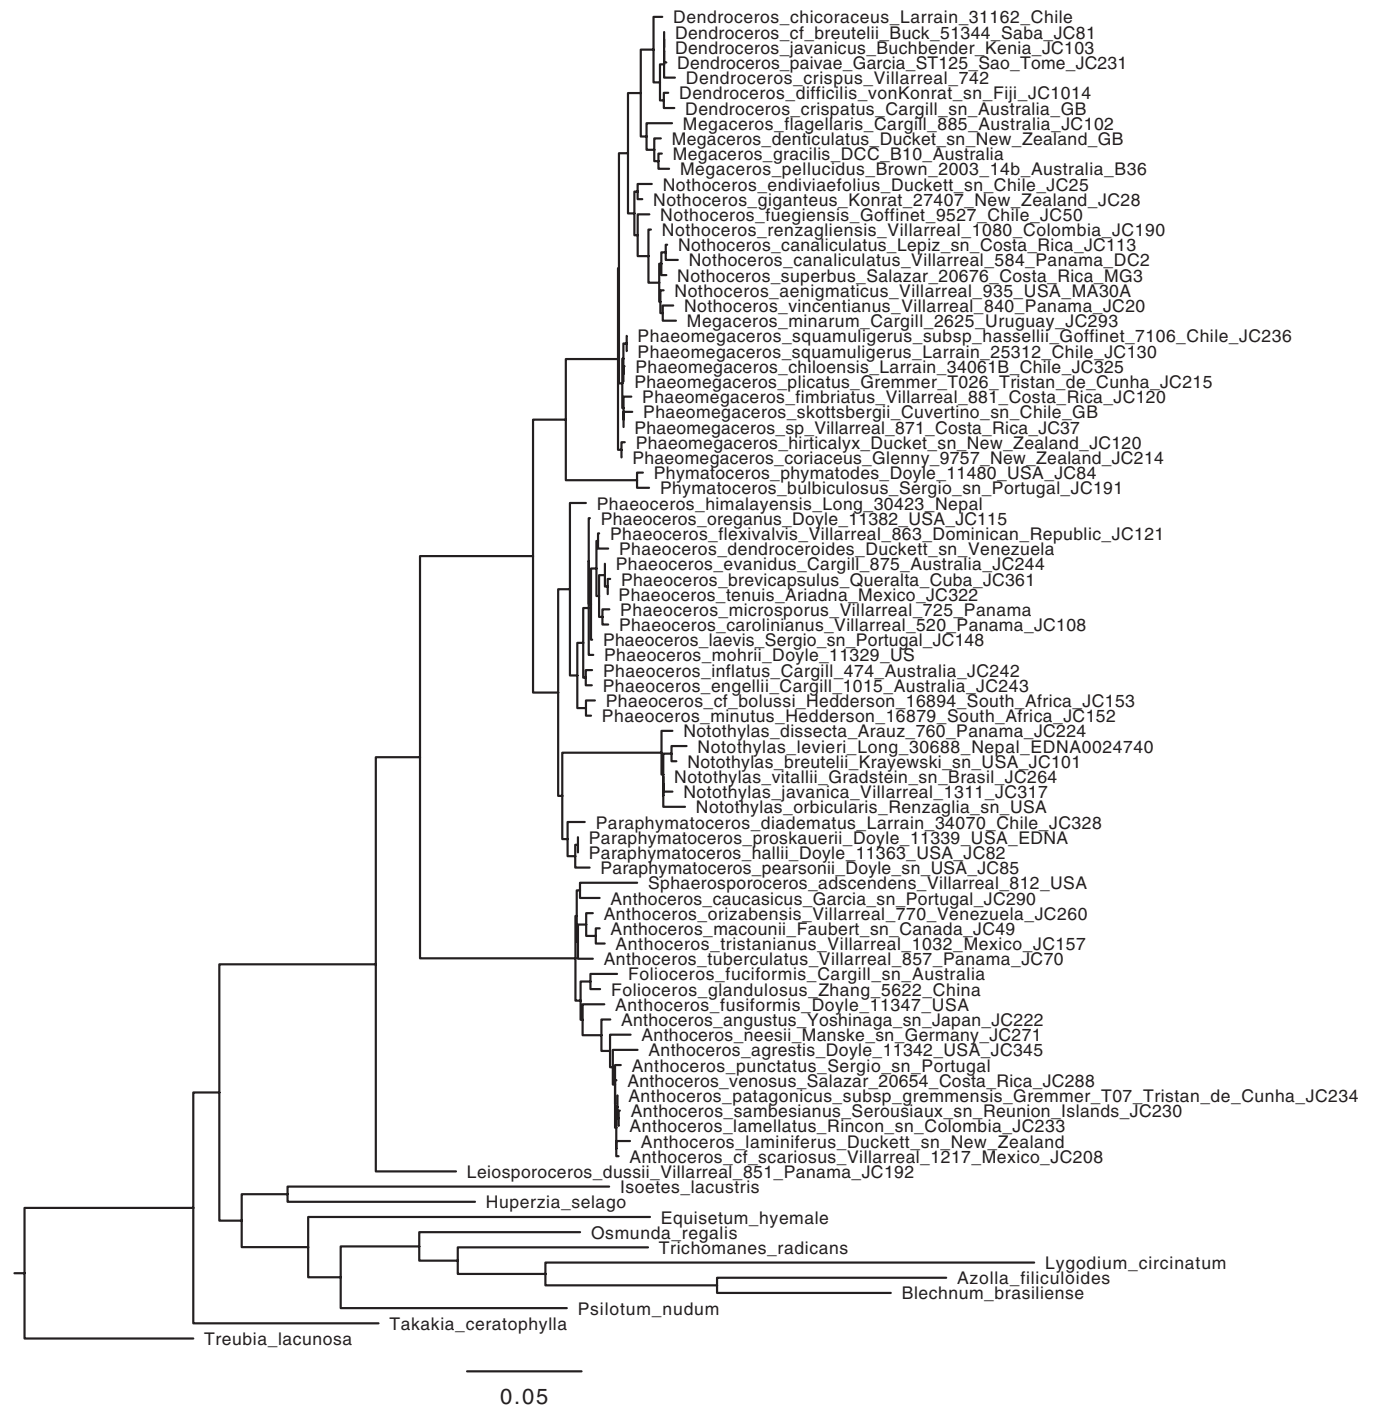

**Fig. S1.** Phylogram for hornworts based on combined plastid and mitochondrial data (2,442 aligned nucleotides). The analyses were performed under maximum-likelihood optimization and the GTR + CAT substitution model, using RAXML 7.2.8 (1). The outgroup comprises vascular plants (lycophytes and ferns), one moss and one liverwort.

1. Stamatakis A (2006) RAXML-VI-HPC: Maximum likelihood-based phylogenetic analyses with thousands of taxa and mixed models. *Bioinformatics* 22(21):2688–2690.

## Other Supporting Information Files

[Table S1 \(DOC\)](#)

[Table S2 \(DOC\)](#)

[Table S3 \(DOC\)](#)

[Table S4 \(DOC\)](#)

[Table S5 \(DOC\)](#)
